# Supplementary material for: Few-monolayer Ga film on Si(111): illusive gallenene formation and localization instead of superconductivity
Source: Royal Society of Chemistry journal article supplement (doi:10.1039/d2me00251e), 2023-01-01
Supplement: d2me00251e1.pdf [file d2me00251e1.pdf]

# **Electronic Supplementary Information: Few-monolayer Ga film on Si(111): Illusive gallenene formation and localization instead of superconductivity**

L. V. Bondarenko<sup>1</sup>, A. Y. Tupchaya<sup>1</sup>, Y. E. Vekovshinin<sup>1</sup>, D. V. Gruznev<sup>1</sup>,  
A. N. Mihalyuk<sup>1,2</sup>, N. V. Denisov<sup>1</sup>, A. V. Matetskiy<sup>1,3</sup>, D. A. Olyanich<sup>1</sup>  
T. V. Utas<sup>1</sup>, V. S. Zhdanov<sup>1</sup>, A. V. Zotov<sup>1</sup> and A. A. Saranin<sup>1</sup>

<sup>1</sup>Institute of Automation and Control Processes FEB RAS,  
5 Radio Street, 690041 Vladivostok, Russia

<sup>2</sup>Institute of High Technologies and Advanced Materials, Far Eastern Federal University,  
690950 Vladivostok, Russia

<sup>3</sup>Instituto di Struttura della Materia, Consiglio Nazionale delle Ricerche, I-34149 Trieste, Italy

January 18, 2023

## 1. Structural features of the second-layer $\sqrt{7}\times\sqrt{7}$ -Ga film

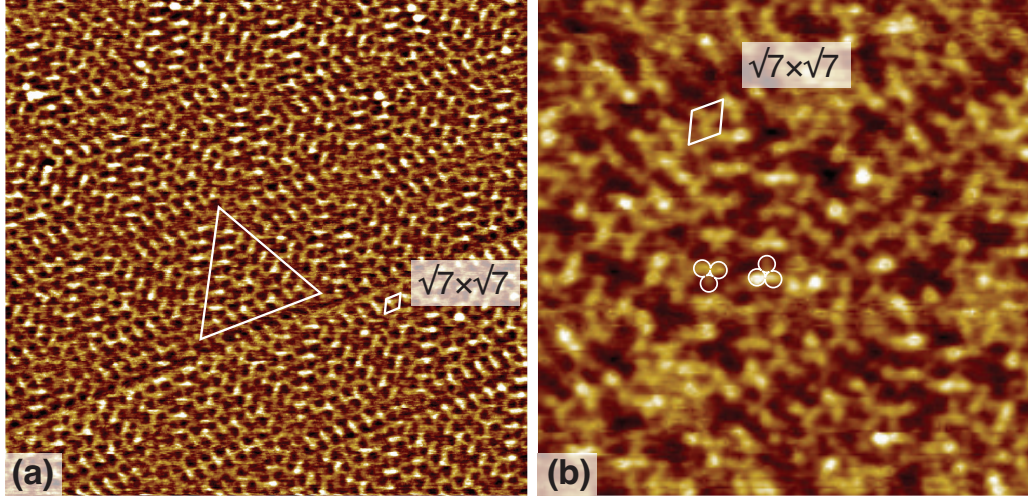

Figure 1S: (a) Large-scale ( $40\times 40\text{ nm}^2$ ) and (b) close-up ( $14\times 14\text{ nm}^2$ ) STM images of the second-layer  $\sqrt{7}\times\sqrt{7}$ -Ga surface acquired at 100 K. The  $\sqrt{7}\times\sqrt{7}$  unit cells are outlined by the rhombuses. The triangle in (a) outlines the characteristic domain of the structure having a size of  $\sim 9\text{ nm}$ . The groups of three circles in (b) indicate the characteristic three-adatom configurations in two possible orientations.

One can distinguish a number of the characteristic features in the structure of the second-layer  $\sqrt{7}\times\sqrt{7}$ -Ga film. At the large scale, this is occurrence of the triangular domains arranged in the network (Fig. 1S (a)). The domains have a size of about 9 nm, but they are not exactly identical and their stacking is not perfect enough to form a long-range superstructure with of  $9\sqrt{7}\times 9\sqrt{7}$  periodicity. In the close-up view, one can notice the characteristic three-adatom configurations (Fig. 1S (b)) predicted by the structural model (Fig. 4). They form the  $\sqrt{7}$ -periodic stripes preferentially along the boundaries of the triangular domains, while the interior of the domains is less ordered.
